# Supplementary material
Source: PubMed Central journal article supplement (PMC8369835)
Supplement: NIHMS1725285-supplement-Supple_tables_methods.pdf [file NIHMS1725285-supplement-Supple_tables_methods.pdf]

## Supplemental material

Included:

Supplemental Methods. Risk of mortality and ipsilateral-breast cancer by age.

Supplemental Table 1. Risk of mortality and IBTR by age for patients in the BCT arm

Supplemental Table 2. Multivariate analysis of overall survival

Supplemental Table 3. Multivariate analysis of disease-free survival

### Supplemental Methods

#### **Risk of mortality and ipsilateral-breast cancer by age.**

Age was grouped into 10-years intervals, and Cox proportional hazards model was used to estimate the relative risk of death and ipsilateral-breast tumor recurrence (IBTR) in each age group. The reference age group was (30,40]. The relative hazard by age for death and IBTR are listed in Table 1 below. The smoothed version of these relative hazards was performed by cubic spline interpolation, and is displayed in hazard\_spiline.pdf.

### Supplemental Tables

sTable 1. Risk of mortality and IBTR by age for patients in the BCT arm

| Age     | Relative Hazard of death | p-value | Relative hazard of IBTR | p-value |
|---------|--------------------------|---------|-------------------------|---------|
| <= 30   | 0.93                     | 0.92    | 0.64                    | 0.68    |
| (30,40] | 1                        |         | 1                       |         |
| (40,50] | 0.97                     | 0.94    | 0.60                    | 0.32    |
| (50,60] | 1.63                     | 0.19    | 0.46                    | 0.18    |
| (60,70] | 2.45                     | 0.02    | 0.82                    | 0.73    |
| > 70    | 3.55                     | 0.01    | 0.71                    | 0.75    |

sTable 2. Multivariate analysis of overall survival

| Characteristic | Value | Hazard ratio | p-value |
|----------------|-------|--------------|---------|
| Age            | <=50  | 1            |         |
|                | >50   | 2.36         | 0.0092  |
| Mass side      | Left  | 1            |         |
|                | Right | 0.57         | 0.0055  |

|                         |      |      |        |
|-------------------------|------|------|--------|
| OCP use                 | No   | 1    |        |
|                         | Yes  | 0.99 | 0.95   |
| Pre and post menopausal | Pre  | 1    |        |
|                         | Post | 1.16 | 0.63   |
| Chemo                   | No   | 1    |        |
|                         | Yes  | 1.16 | 0.83   |
| Tumor stage             | T1   | 1    |        |
|                         | T2   | 1.67 | 0.0086 |
| # of Nodes              | 0    | 1    |        |
|                         | 1-3  | 1.47 | 0.59   |
|                         | >=4  | 5.88 | 0.011  |

sTable 3. Multivariate analysis of disease-free survival

| Characteristic | Value | Hazard ratio | p-value |
|----------------|-------|--------------|---------|
| Treatment      | MRM   | 1            |         |
|                | BCT   | 1.92         | 0.0023  |
| Chemo          | No    | 1            |         |
|                | Yes   | 2.91         | 0.20    |
| Tumor stage    | T1    | 1            |         |
|                | T2    | 2.04         | 0.00070 |
| # of Nodes     | 0     | 1            |         |
|                | 1-3   | 0.53         | 0.46    |
|                | >=4   | 1.52         | 0.62    |
